# Supplementary material for: Biomimetic electrospun PVDF/self-assembling peptide piezoelectric scaffolds for neural stem cell transplantation in neural tissue engineering
Source: Royal Society of Chemistry journal article supplement (doi:10.1039/d4ra02309a), 2024-01-01
Supplement: d4ra02309a1.pdf [file d4ra02309a1.pdf]

## Biomimetic Electrospun PVDF/Self-Assembling Peptide Piezoelectric Scaffolds for Neural Stem Cell Transplantation in Neural Tissue Engineering

Mahdi Forouharshad<sup>1</sup>, Andrea Raspa<sup>1</sup>, Giuseppe Fortino<sup>2</sup>, Maria Gessica Ciulla<sup>1</sup>, Arman Farazdaghi<sup>3</sup>, Vlad Stolojan<sup>4</sup>, Luca Stando<sup>5</sup>, Silvia Bracco<sup>5</sup>, Fabrizio Gelain<sup>1,6,\*</sup>

<sup>1</sup>Center for Nanomedicine and Tissue Engineering (CNTE), ASST Grande Ospedale Metropolitano Niguarda, 20162 Milan, Italy.

<sup>2</sup>Department of Biotechnology and Bioscience, University of Milano – Bicocca, via R. Cozzi 55, 20125 Milano, Italy.

<sup>3</sup>Chemical and Biomolecular Engineering Department, Whiting School of Engineering, Johns Hopkins University, MD, USA.

<sup>4</sup>Advanced Technology Institute, Electrical and Electronic Engineering, University of Surrey, Guildford GU2 7XH, UK.

<sup>5</sup>Department of Materials Science, University of Milano – Bicocca, via R. Cozzi 55, 20125 Milano, Italy.

<sup>6</sup>Institute for Stem-Cell Biology, Regenerative Medicine and Innovative Therapies, IRCCS Casa Sollievo della Sofferenza, 71013 San Giovanni Rotondo, Italy.

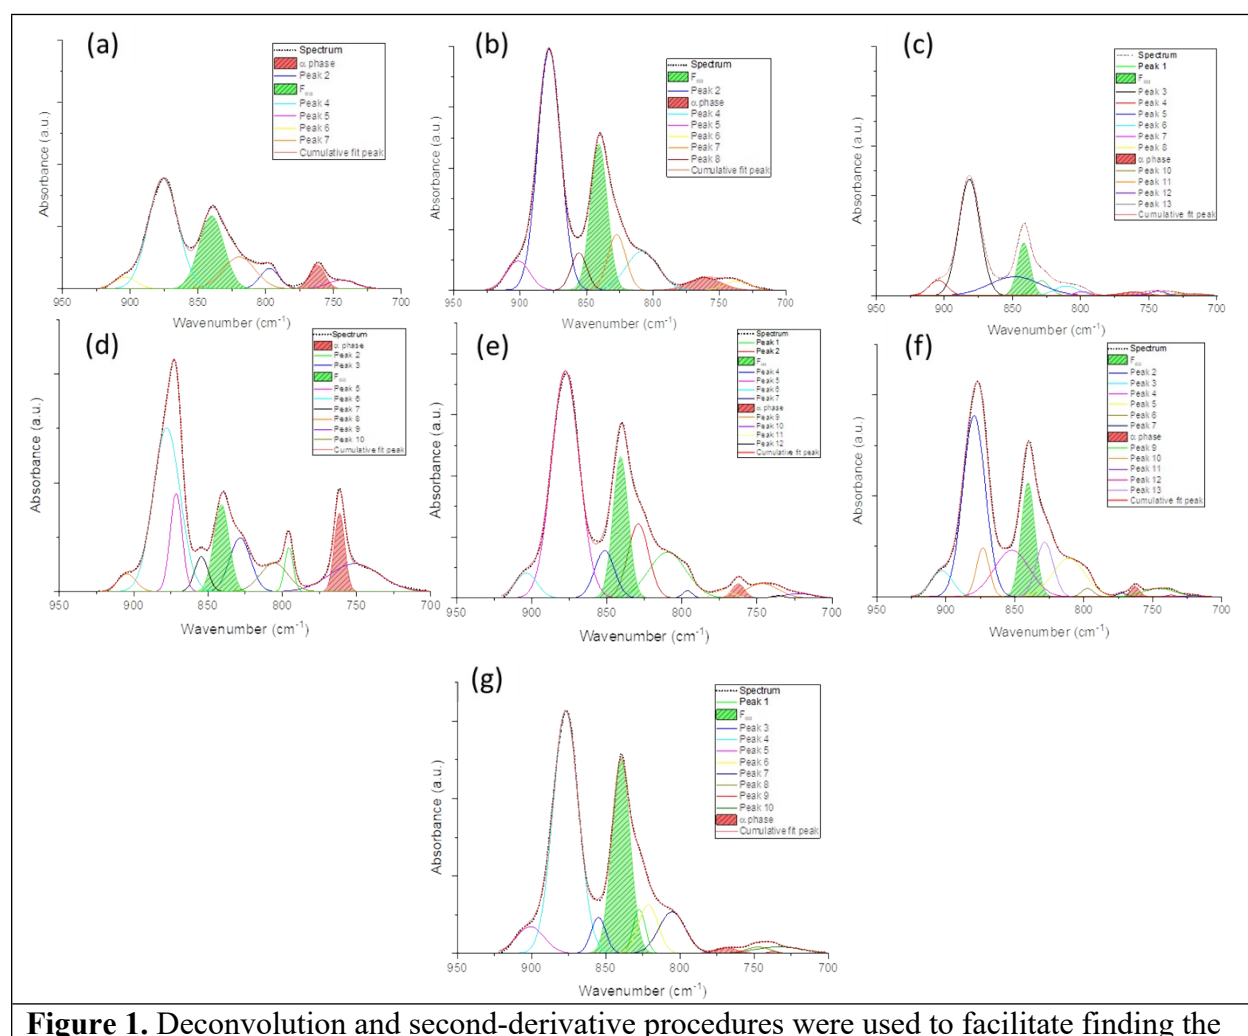

peak positions corresponding to the  $\alpha$ ,  $\beta$ , and  $\gamma$  in their IR spectra (range 950-700  $\text{cm}^{-1}$ ) and for the quantitative analysis of the phase content. (a) PVDF, (b) PVDF-SDS, (c) PVDF-SDS-al, (d) PVDF-DMF100, (e) PVDF-SDS-DMF100, (f) PVDF-FAQ(LDLK)<sub>3</sub>, and (g) PVDF-SDS-FAQ(LDLK)<sub>3</sub>.

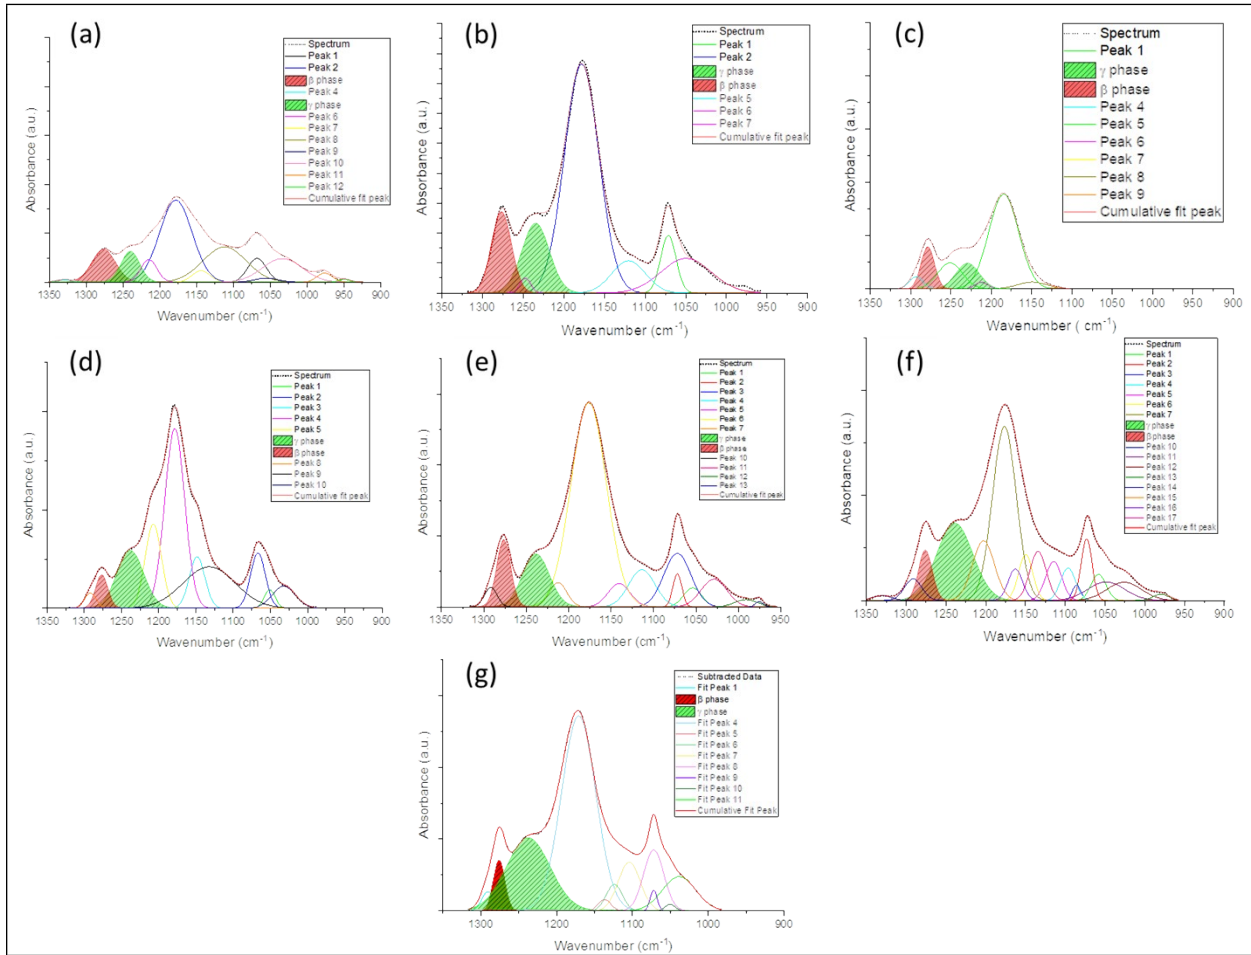

**Figure 2.** Deconvolution and second-derivative procedures were used to facilitate finding the peak positions corresponding to the  $\beta$  and  $\gamma$  in their IR spectra (range 1350-950  $\text{cm}^{-1}$ ) and quantitative analysis of the phase content. (a) PVDF, (b) PVDF-SDS, (c) PVDF-SDS-al, (d) PVDF-DMF100, (e) PVDF-SDS-DMF100, (f) PVDF-FAQ(LDLK)<sub>3</sub>, and (g) PVDF-SDS-FAQ(LDLK)<sub>3</sub>.

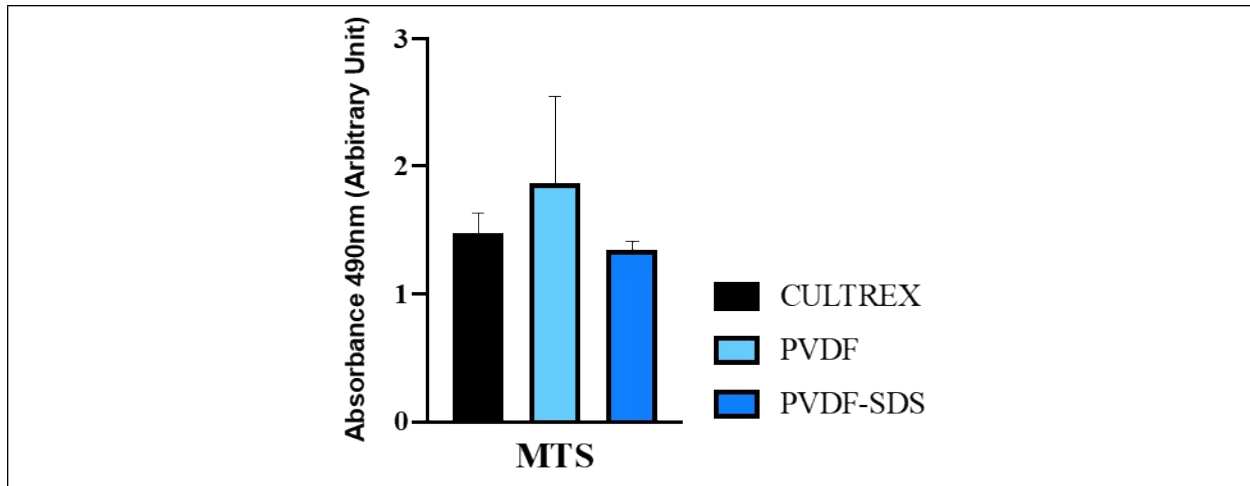

**Figure 3.** MTS assay on our PVDF and PVDF-SDS samples to assess cytotoxicity. Cultrex, the gold standard, was used as the control. Stem cells were seeded in both the control group and on the PVDF and PVDF-SDS samples. The graph shows no significant differences in cell viability between the PVDF and PVDF-SDS samples and the positive control, Cultrex. As depicted, the cell viability for both PVDF and PVDF-SDS samples closely aligns with the positive control, confirming their biocompatibility.

**Table 1.** Piezoelectric experiments to investigate the correlation between the thickness of PVDF meshes and the resulting voltage and capacitance.

| Sample<br>(mg/cm <sup>2</sup> ) | V <sub>AC rms</sub><br>[mV] | V <sub>p-p</sub><br>[mV] | C <sub>100Hz</sub><br>[pF] | Θ <sub>100Hz</sub><br>[pF] | C <sub>100kHz</sub><br>[pF] | Θ <sub>100kHz</sub><br>[pF] |
|---------------------------------|-----------------------------|--------------------------|----------------------------|----------------------------|-----------------------------|-----------------------------|
| 1                               | 58.22                       | 181.5                    | 375                        | -89.4                      | 369                         | -89.4                       |
| 2                               | 180                         | 532                      | 217                        | -89.2                      | 210                         | -89.6                       |
| 3                               | 625                         | 1780                     | 159                        | -89.4                      | 154                         | -89.5                       |
| 4                               | 38                          | 120                      | 210                        | -89.3                      | 201                         | -89.4                       |

V<sub>AC</sub>: Voltage Alternating Current

V<sub>p-p</sub>: peak-to-peak voltage

C: Capacitance

Θ: phase shift
